# Supplementary material for: Survey of Australian and Canadian Community Pharmacists’ Experiences With Patients at Risk of Suicide
Source: Atypon-hosted journal article supplement (doi:10.1176/appi.ps.201900244), 2019-11-20
Supplement: appi.ps.201900244.ds001.pdf [file appi.ps.201900244.ds001.pdf]

**Variables included in the multivariable logistic regression for preparedness to help a person in a suicidal crisis**

Included were survey variables identified as potentially impacting a pharmacist's preparedness to help a person in a suicidal crisis. Variables were selected based on an interim analysis (Canadian data only), other research, and our tacit knowledge.

Age

Sex

Country

Location

Years of patient care experience

Mental health crisis training

Length of time since mental health crisis training

Number of times interacting with a person at risk of suicide

Length of time since most recent interaction with someone at risk of suicide

Involved in the care of someone with a recent suicide attempt

Having a patient who died by suicide

Perceived barriers:

- lack of training
- lack of time
- lack of confidence
- patient was unknown to pharmacist
- concerns about breaching patient confidentiality
- worried about making the situation worse for the patient
- making patient uncomfortable
- concerns about liability
- lack of private space
- not knowing what to do
- lack of available tools and resources

Personal diagnosis of a mental illness

Someone close to the respondent lives with a mental illness

Someone close to the respondent died from suicide

Perceived preventability of suicide

Permissive attitudes about suicide

Experience assessing suicide risk (assessed thoughts, plans, intentions, and/or means)

**Table 1:** Characteristics of Australian and Canadian pharmacist respondents and their experiences with patients at risk of suicide

|                                                                             | Overall     |      | Canada      |      | Australia   |      | p value |
|-----------------------------------------------------------------------------|-------------|------|-------------|------|-------------|------|---------|
|                                                                             | 396         |      | 235         |      | 161         |      |         |
|                                                                             | N           | %    | N           | %    | N           | %    |         |
| <b>Age (M±SD)</b>                                                           | 38.6 ± 12.7 |      | 42.2 ± 12.2 |      | 33.3 ± 11.7 |      | <0.0001 |
| <b>Years of community pharmacy experience (M±SD)</b>                        | 14.1 ± 12.4 |      | 17.0 ± 12.5 |      | 9.9 ± 11.1  |      | <0.0001 |
| <b>Sex</b>                                                                  |             |      |             |      |             |      |         |
| Female                                                                      | 276         | 69.7 | 167         | 71.1 | 109         | 67.7 |         |
| Male                                                                        | 119         | 30.1 | 68          | 28.9 | 51          | 31.7 | 0.4     |
| Other                                                                       | 1           | 0.3  | 0           | 0.0  | 1           | 0.6  |         |
| <b>Currently Practicing as a community pharmacist</b>                       | 343         | 86.6 | 195         | 83.0 | 148         | 91.9 | 0.01    |
| <b>Geographic location*</b>                                                 |             |      |             |      |             |      |         |
| Remote                                                                      | 6           | 1.5  | 2           | 0.9  | 4           | 2.5  |         |
| Rural                                                                       | 105         | 26.5 | 73          | 31.1 | 32          | 19.9 | 0.02    |
| Urban                                                                       | 285         | 72.0 | 160         | 68.1 | 125         | 77.6 |         |
| <b>Position in the pharmacy</b>                                             |             |      |             |      |             |      |         |
| Pharmacist employee                                                         | 235         | 59.3 | 150         | 63.8 | 85          | 52.8 |         |
| Pharmacist manager                                                          | 92          | 23.2 | 53          | 22.6 | 39          | 24.2 | 0.03    |
| Pharmacist owner                                                            | 69          | 17.4 | 32          | 13.6 | 37          | 23.0 |         |
| <b>Number of times you have interacted with a person at risk of suicide</b> |             |      |             |      |             |      |         |
| 0 times                                                                     | 61          | 15.4 | 37          | 15.7 | 24          | 14.9 |         |
| 1-2                                                                         | 159         | 40.2 | 88          | 37.4 | 71          | 44.1 |         |
| 3-5                                                                         | 103         | 26.0 | 63          | 26.8 | 40          | 24.8 | 0.38    |
| 6-10                                                                        | 34          | 8.6  | 25          | 10.6 | 9           | 5.6  |         |
| >10                                                                         | 39          | 9.8  | 22          | 9.4  | 17          | 10.6 |         |

\* Geographic location was determined by the respondent and not defined in the survey. \*\*The most prominent experience with a patient at risk of suicide was left to the interpretation of the respondent.

**Table 2:** Characteristics of community pharmacists most prominent experiences with a patient at risk of suicide\*

|                                                                                 | Overall |      | Canada |      | Australia |      | p value |
|---------------------------------------------------------------------------------|---------|------|--------|------|-----------|------|---------|
|                                                                                 | 324     |      | 189    |      | 135       |      |         |
|                                                                                 | N       | %    | N      | %    | N         | %    |         |
| <b>How did your concern arise for the patient at risk of suicide?</b>           |         |      |        |      |           |      |         |
| Patient directly indicated that they had thoughts of suicide                    | 213     | 65.7 | 123    | 65.1 | 90        | 66.7 | 0.99    |
| I directly inquired based on the clinical circumstances                         | 44      | 13.6 | 26     | 13.8 | 18        | 13.3 |         |
| Another person informed me that the patient had thoughts of suicide             | 38      | 11.7 | 23     | 12.2 | 15        | 11.1 |         |
| Other                                                                           | 29      | 9.0  | 17     | 9.0  | 12        | 8.9  |         |
| <b>Did you determine if the person:</b>                                         |         |      |        |      |           |      |         |
| had thoughts of suicide?                                                        | 244     | 75.3 | 142    | 75.1 | 102       | 75.6 | 1.00    |
| had a plan for how they would do it?                                            | 130     | 40.1 | 77     | 40.7 | 53        | 39.3 | 0.94    |
| intended to carry out their plan?                                               | 136     | 42.0 | 77     | 40.7 | 59        | 43.7 | 0.79    |
| had access to the means to carry out their plan?                                | 117     | 36.1 | 67     | 35.5 | 50        | 37.0 | 0.79    |
| <b>How was information gathered about thoughts, plans, and access to means?</b> |         |      |        |      |           |      |         |
| Asked                                                                           | 155     | 57.8 | 87     | 55.1 | 68        | 61.8 | 0.31    |
| Volunteered                                                                     | 145     | 54.1 | 85     | 53.8 | 60        | 54.6 | 0.38    |
| <b>How did you feel about your involvement when the situation ended?</b>        |         |      |        |      |           |      |         |
| Very uncomfortable                                                              | 33      | 10.3 | 19     | 10.1 | 14        | 10.6 | 0.97    |
| Uncomfortable                                                                   | 161     | 50.3 | 96     | 51.1 | 65        | 49.2 |         |
| Comfortable                                                                     | 111     | 34.7 | 65     | 34.6 | 46        | 34.8 |         |
| Very comfortable                                                                | 15      | 4.7  | 8      | 4.3  | 7         | 5.3  |         |
| <b>How satisfied were you with the management of the situation?</b>             |         |      |        |      |           |      |         |
| Very dissatisfied                                                               | 7       | 2.2  | 3      | 1.6  | 4         | 3.0  | 0.91    |
| Dissatisfied                                                                    | 74      | 23.1 | 43     | 22.9 | 31        | 23.5 |         |
| Neutral                                                                         | 104     | 32.5 | 62     | 33.0 | 42        | 31.8 |         |
| Satisfied                                                                       | 113     | 35.3 | 68     | 36.2 | 45        | 34.1 |         |
| Very satisfied                                                                  | 22      | 6.9  | 12     | 6.4  | 10        | 7.6  |         |

\* When responding to the section focused on community pharmacists most prominent experiences with a patient at risk of suicide, the lead-in instructions to participants stated: "Thinking about the most prominent experience with a patient at risk of suicide, ..."

**Table 3:** Community pharmacists assessments of potential barriers that could interfere with supporting or caring for a patient at risk of suicide\*

|                                              | Overall |      | Canada |      | Australia |      | p value |
|----------------------------------------------|---------|------|--------|------|-----------|------|---------|
|                                              | 371     |      | 217    |      | 154       |      |         |
|                                              | N       | %    | N      | %    | N         | %    |         |
| <b>Lack of confidence</b>                    |         |      |        |      |           |      |         |
| Not a barrier                                | 62      | 16.7 | 31     | 14.3 | 31        | 20.1 | 0.04    |
| Small barrier                                | 148     | 39.9 | 94     | 43.3 | 54        | 35.1 |         |
| Moderate barrier                             | 106     | 28.6 | 67     | 30.9 | 39        | 25.3 |         |
| Significant barrier                          | 55      | 14.8 | 25     | 11.5 | 30        | 19.5 |         |
| <b>Lack of training</b>                      |         |      |        |      |           |      |         |
| Not a barrier                                | 16      | 4.3  | 7      | 3.2  | 9         | 5.8  | 0.25    |
| Small barrier                                | 112     | 30.2 | 66     | 30.4 | 46        | 29.9 |         |
| Moderate barrier                             | 133     | 35.8 | 85     | 39.2 | 48        | 31.2 |         |
| Significant barrier                          | 110     | 29.6 | 59     | 27.2 | 51        | 33.1 |         |
| <b>Lack of time</b>                          |         |      |        |      |           |      |         |
| Not a barrier                                | 102     | 27.5 | 62     | 28.6 | 40        | 26.0 | 0.26    |
| Small barrier                                | 117     | 31.5 | 74     | 34.1 | 43        | 27.9 |         |
| Moderate barrier                             | 92      | 24.8 | 52     | 24.0 | 40        | 26   |         |
| Significant barrier                          | 60      | 16.2 | 29     | 13.4 | 31        | 20.1 |         |
| <b>Lack of private space</b>                 |         |      |        |      |           |      |         |
| Not a barrier                                | 127     | 34.2 | 87     | 40.1 | 40        | 26.0 | 0.001   |
| Small barrier                                | 128     | 34.5 | 77     | 35.5 | 51        | 33.1 |         |
| Moderate barrier                             | 70      | 18.9 | 36     | 16.6 | 34        | 22.1 |         |
| Significant barrier                          | 46      | 12.4 | 17     | 7.8  | 29        | 18.8 |         |
| <b>Not knowing what to do</b>                |         |      |        |      |           |      |         |
| Not a barrier                                | 32      | 8.6  | 15     | 6.9  | 17        | 11   | 0.29    |
| Small barrier                                | 105     | 28.3 | 65     | 30   | 40        | 26   |         |
| Moderate barrier                             | 134     | 36.1 | 83     | 38.2 | 51        | 33.1 |         |
| Significant barrier                          | 100     | 27.0 | 54     | 24.9 | 46        | 29.9 |         |
| <b>Lack of available tools and resources</b> |         |      |        |      |           |      |         |
| Not a barrier                                | 27      | 7.3  | 12     | 5.5  | 15        | 9.7  | 0.48    |
| Small barrier                                | 105     | 28.3 | 63     | 29.0 | 42        | 27.3 |         |
| Moderate barrier                             | 148     | 39.9 | 89     | 41.0 | 59        | 38.3 |         |
| Significant barrier                          | 91      | 24.5 | 53     | 24.4 | 38        | 24.7 |         |

\* When completing the assessment of barriers section, instructions to participants stated: "Score the following potential barriers that could prevent you from supporting or caring for a patient who you perceive to be at risk of suicide." Response options for each potential barrier were specifically described as:

1. Is in no way a barrier; it would not affect my willingness or abilities
2. Is a small barrier; it is unlikely to affect my willingness or abilities
3. Is a moderate barrier; it could diminish my willingness or abilities
4. Is a significant barrier; it would affect my willingness or abilities
